# Supplementary material for: Synthesis of homo- and hetero-metallic cobalt and zinc nano oxide particles by a calcination process using coordination compounds: their characterization, DFT calculations and capacitance behavioural study
Source: Royal Society of Chemistry journal article supplement (doi:10.1039/d0ra01191f), 2020-01-01
Supplement: d0ra01191f1.pdf [file d0ra01191f1.pdf]

SI data -RA-ART-02-2020-001191

**Synthesis of homo- and hetero-metallic cobalt and zinc nano oxide particles  
by a calcination process using coordination compounds: Their  
characterization, DFT calculations and capacitance behavioural study**

Sartaj Tabassum,<sup>φ, \$, \*</sup> Mohammad Usman<sup>φ</sup>, Hamad A. Al-Lohedan<sup>\$</sup>, Mahmood

M. S. Abdull<sup>\$</sup>, Mohamed A. Ghanem,<sup>\$</sup> Merfat S. Al-Sharif<sup>\$</sup>, Mohd Sajid Ali<sup>\$</sup>.

<sup>φ</sup> *Department of Chemistry, Aligarh Muslim University, Aligarh-202002, India*

<sup>\$</sup> *Department of Chemistry, College of Sciences, King Saud University, P.O. Box 2455,  
Riyadh 11451, KSA.*

*\*corresponding author, email: [tsartaj62@yahoo.com](mailto:tsartaj62@yahoo.com), +919358255791.*

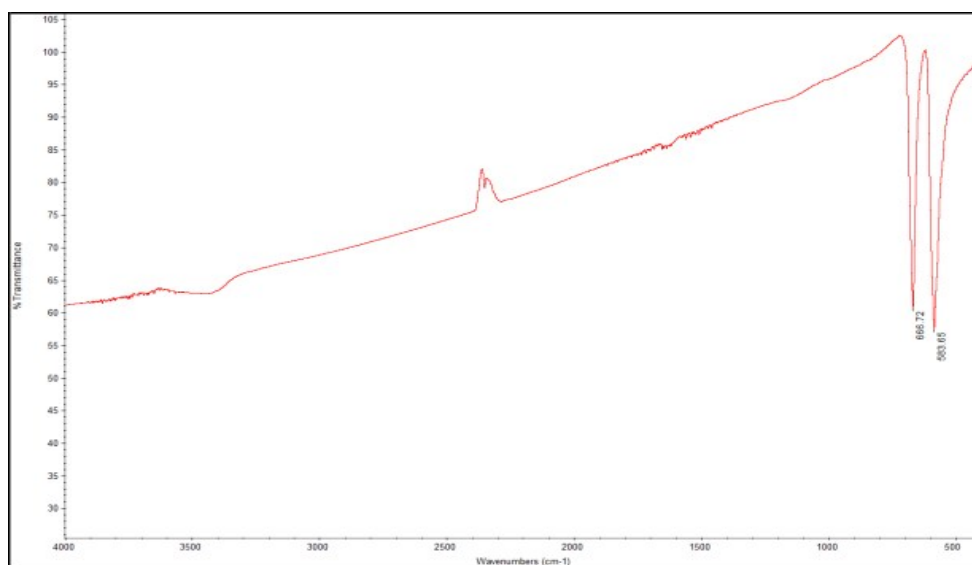

Fig.S1 FTIR spectrum of Co<sub>3</sub>O<sub>4</sub> nanoparticles.

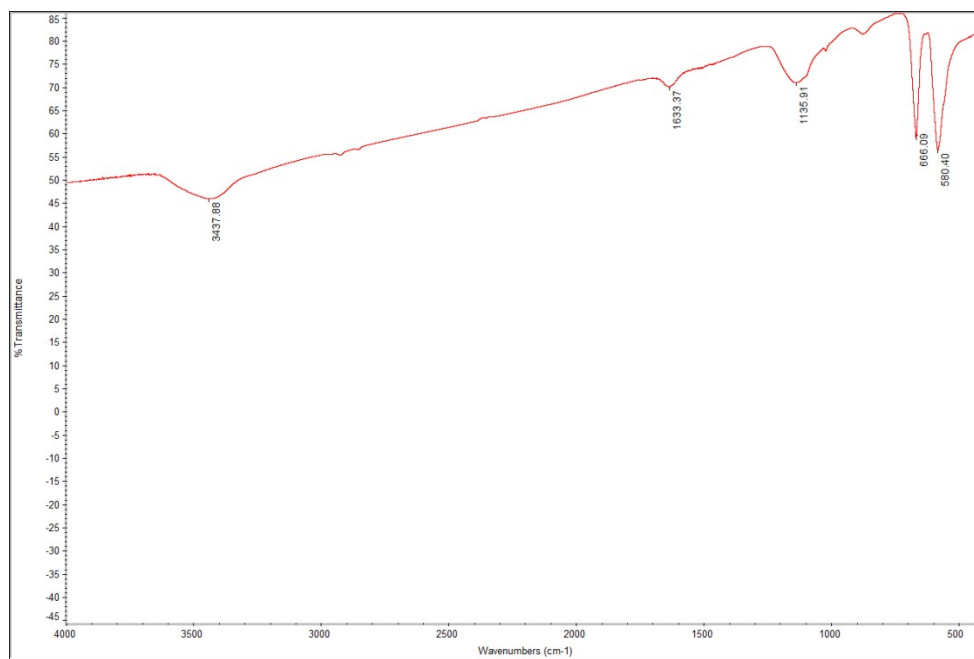

Fig. S2 FTIR spectrum of ZnOC<sub>3</sub>O<sub>4</sub>.

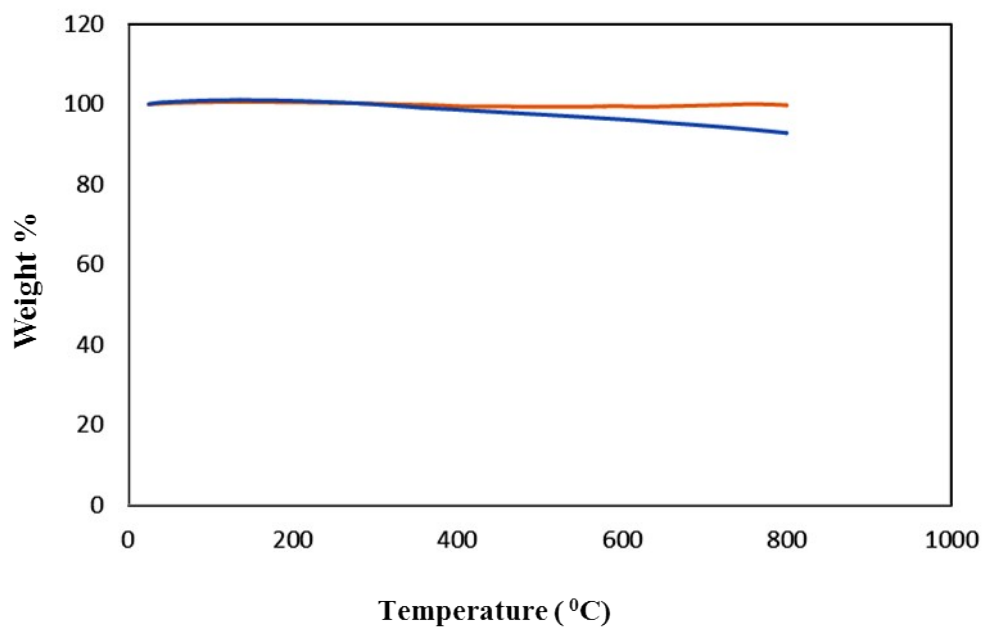

Fig. S3 TGA of the nanoparticles.

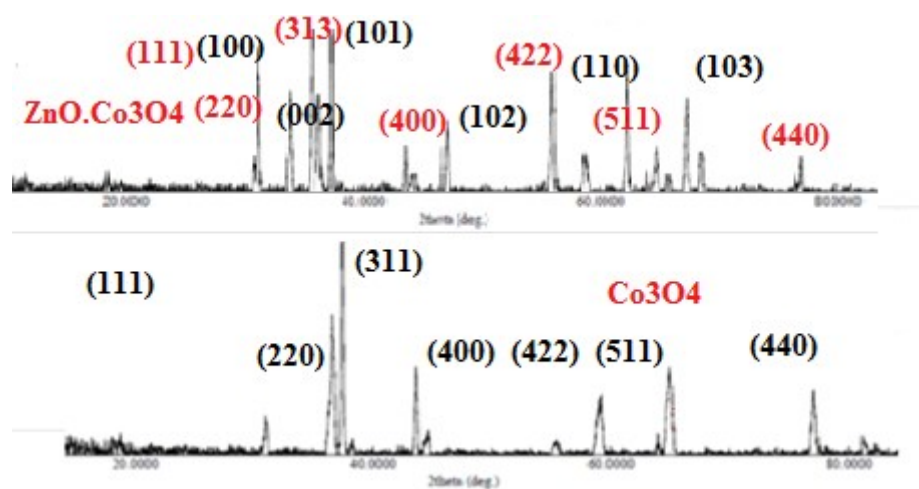

Fig. S4 XRD pattern line with lattice parameters  $\text{ZnO} \cdot \text{Co}_3\text{O}_4$  and  $\text{Co}_3\text{O}_4$ . (JCPDS Data Card No: 36-1451)

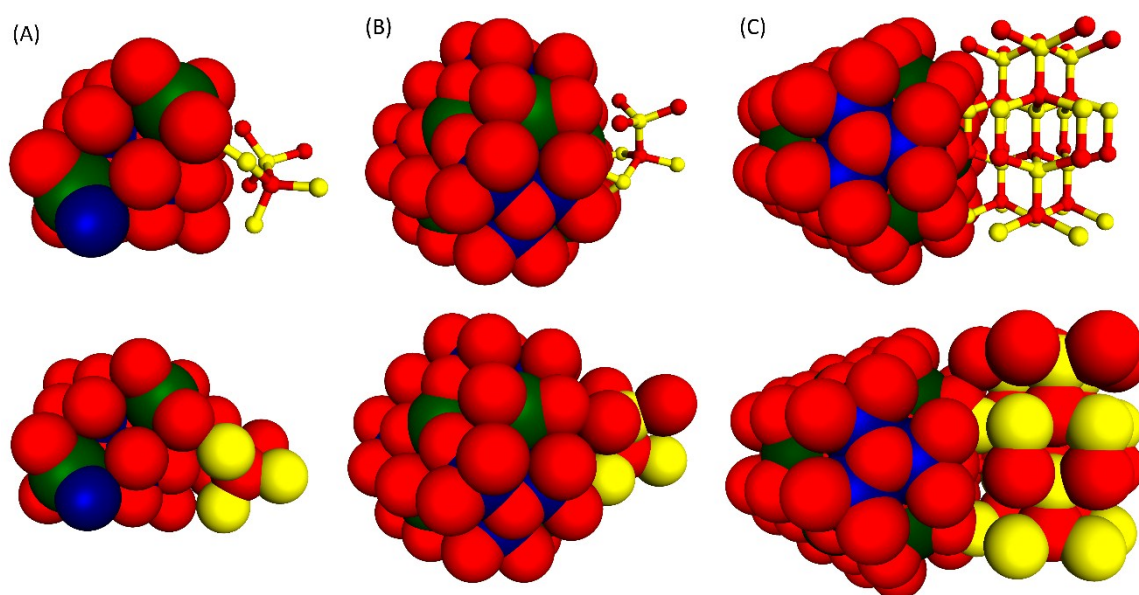

**Fig. S5.** The Illustration of CPK models of the global minimum energy geometry of  $\text{Co}_3\text{O}_4\text{ZnO}$  adducts, (A) Model 1, (B) Model 2, and (C) Model 3.
